# Supplementary material for: Porous corundum-type In2O3 nanoflowers: controllable synthesis, enhanced ethanol-sensing properties and response mechanism
Source: Royal Society of Chemistry journal article supplement (doi:10.1039/c5ce00279f), 2015-01-01

## Electronic Supplementary Information (ESI)

### **Porous Corundum-type In<sub>2</sub>O<sub>3</sub> Nanoflowers: Controllable Synthesis, Enhanced Ethanol-sensing Properties and Response Mechanism**

**Liping Gao,<sup>a</sup> Zhixuan Cheng,<sup>\*b</sup> Qun Xiang,<sup>b</sup> and Jiaqiang Xu<sup>\*a,b,c</sup>**

<sup>a</sup> Department of Physics, College of Science, Shanghai University, Shanghai, 200444, China E-mail: [xujiaqiang@shu.edu.cn](mailto:xujiaqiang@shu.edu.cn); Tel: +86 21 66132701

<sup>b</sup> NEST Lab, Department of Chemistry, College of Science, Shanghai University, Shanghai, 200444, China.

<sup>c</sup> State Key Laboratory of Transducer Technology, Shanghai Institute of Microsystem and Information Technology, Chinese Academy of Sciences, Shanghai, 200050, China

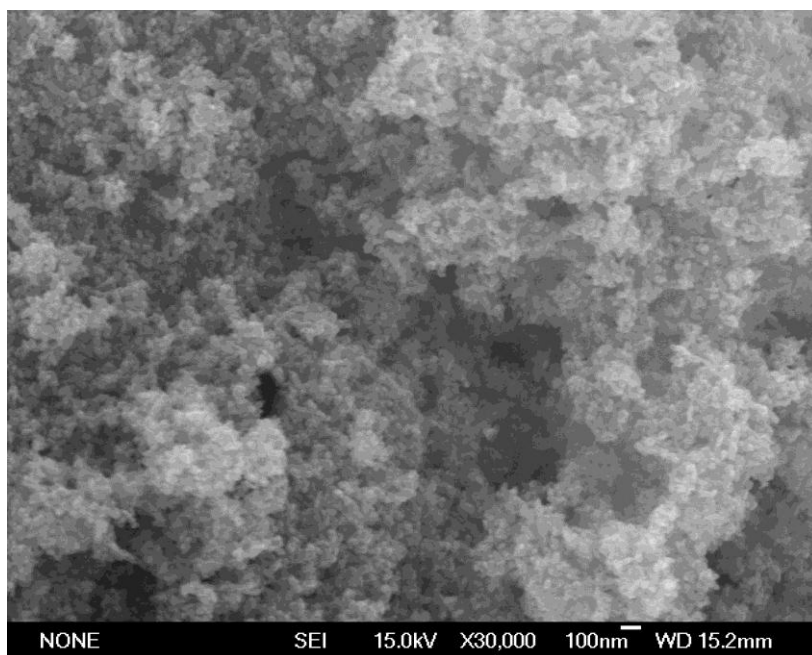

**Fig.1s** TEM images of In<sub>2</sub>O<sub>3</sub> synthesized using CTAB as surfactant.

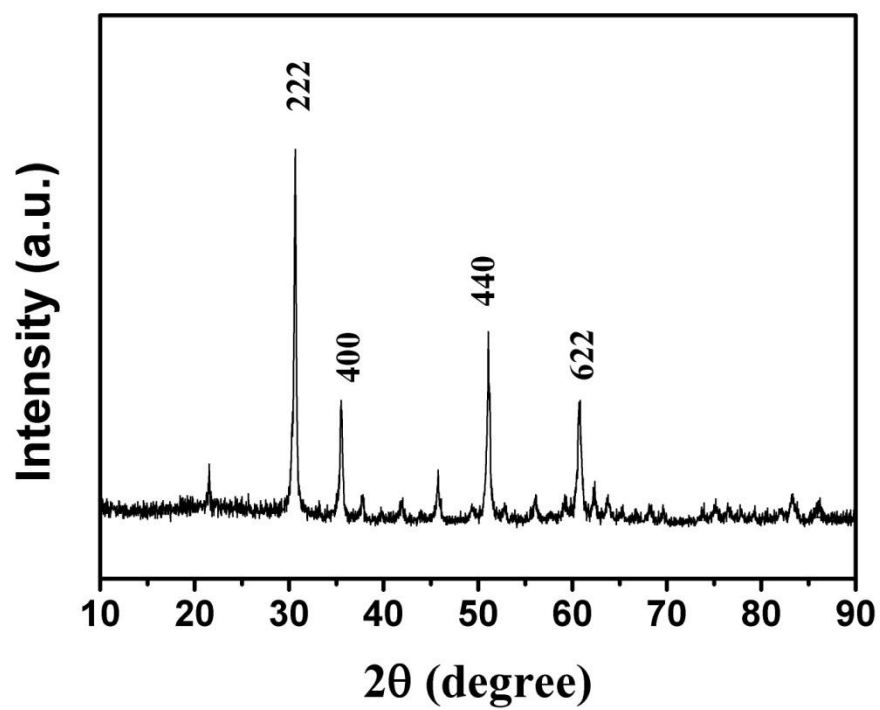

**Fig.2s** XRD of  $\text{In}_2\text{O}_3$  synthesized by controlling the pH value is 8. (NaOH was added to control the pH value)

## Gas sensing properties of the sensors

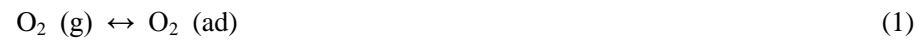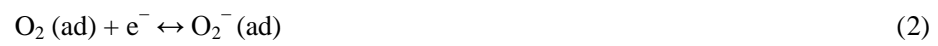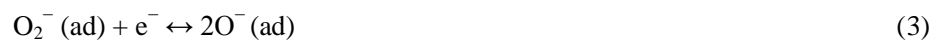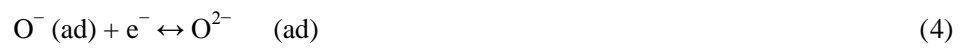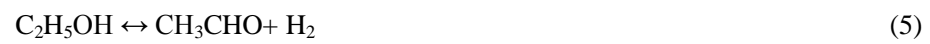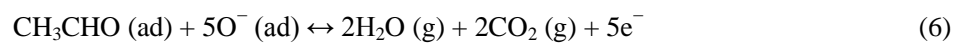

Supplement: c5ce00279f1.pdf [file c5ce00279f1.pdf]
